# Supplementary material for: Clustering and curation of electropherograms: an efficient method for analyzing large cohorts of capillary electrophoresis glycomic profiles for bioprocessing operations
Source: Beilstein J Org Chem. 2020 Aug 27;16:2087–99. doi: 10.3762/bjoc.16.176 (PMC7476600; doi:10.3762/bjoc.16.176)
Supplement: File 2 — Variability standard deviation data. [file Beilstein_J_Org_Chem-16-2087-s002.xlsx]

## Sheet: variability-standard deviation
Condition	M3	FA2G2S2	A2(6)G1S1	FA2(6)G1S1	FA2(3)G1S1	FA1	M5	UNK_1	UNK_2	FA2	A2(3)G1	UNK_3	M7[D2]	M7[D3]	FA2(6)G1	FA2(3)G1	M8	UNK_4	UNK_5	FA2G2	M9	<- Glycan
D03_CONDITION_1	0.00131488	0.00374095	0.004349	0.00207978	0.00419385	0.0315356	0.0206296	0.00205116	0.0025779	0.329415	0.00314594	0.00677058	0.00354837	0.00665544	0.206303	0.0675025	0.000275255	0.0022755	0.00175493	0.0240158	0.00115777
D04_CONDITION_1	0.00438446	0.00368501	0.00202233	0.0117902	0.0126562	0.0223857	0.160628	0.00278545	0.00388358	0.0768601	0.03739	0.00129775	0.00398835	0.0175486	0.0956304	0.00681894	0.00352744	0.00185717	0.00227488	0.00632111	0.00235066
D05_CONDITION_1	0.00343405	0.00317015	0.00215785	0.00545128	0.00199388	0.0424057	0.0194058	0.00167537	0.00480071	0.274458	0.0134918	0.0110367	0.00509082	0.00776721	0.0612829	0.0819177	0.00294116	0.00241747	0.00338456	0.0188527	0.00337822
D06_CONDITION_1	0.00189924	0.00156885	0.00125794	0.00194439	0.00293995	0.00828823	0.0134252	0.000640891	0.00169749	0.0103952	0.00693653	0.00263713	0.00137332	0.00383827	0.0207792	0.00383911	0.00263372	0.00105162	0.00130194	0.00317561	0.00153451
D07_CONDITION_1	0.00590023	0.00366495	0.00679082	0.00659414	0.00920145	0.0878059	0.0439815	0.0022696	0.00211963	0.104481	0.0116266	0.00413836	0.00135073	0.00438648	0.0165047	0.0226995	0.000657144	0.000808815	0.00257036	0.00214824	0.00136234
D08_CONDITION_1	0.00184685	0.00222076	0.00286062	0.00686362	0.00578292	0.0186184	0.0343581	0.00286984	0.00540422	0.0631608	0.0127595	0.00210981	0.00205794	0.00980708	0.0512135	0.01756	0.00107651	0.000512591	0.000875412	0.00292533	0.000992897
D09_CONDITION_1	0.00848707	0.00620884	0.0064695	0.00196156	0.0125966	0.0358819	0.0531338	0.0022804	0.0013293	0.00563876	0.00842452	0.00541798	0.00220385	0.00867887	0.0436729	0.0109769	0.00154545	0.00180481	0.0015001	0.00256077	0.00589173
D10_CONDITION_1	0.00513188	0.0052569	0.00288123	0.00447235	0.00779157	0.0308567	0.0626496	0.00146583	0.00362945	0.00849065	0.00630056	0.0035768	0.00372876	0.00504211	0.0380789	0.0147152	0.0022174	0.00132978	0.00336865	0.00698243	0.00241373
D11_CONDITION_1	0.00545015	0.00439804	0.00140733	0.00997177	0.00438335	0.0520756	0.0328223	0.00138117	0.00506744	0.0786051	0.0091502	0.00271543	0.00909566	0.0132898	0.0350912	0.0102701	0.00457285	0.00192687	0.00570133	0.0117297	0.0027216
D12_CONDITION_1	0.00396125	0.00262147	0.000305904	0.00300341	0.00429597	0.06107	0.0386746	0.00146133	0.00615957	0.154731	0.0151132	0.00796506	0.0108846	0.00851536	0.0713983	0.064736	0.00176822	0.000738757	0.00357473	0.0165709	0.00264346
D13_CONDITION_1	0.00376806	0.00362734	0.00289308	0.00431985	0.00418827	0.0265519	0.0653223	0.00118591	0.00818316	0.0870148	0.0132442	0.00437662	0.00474011	0.00989394	0.0364023	0.0238674	0.00171546	0.00129453	0.00631989	0.00656425	0.00491215
D14_CONDITION_1	0.0101499	0.0066968	0.00611225	0.0203311	0.00835716	0.0463973	0.045719	0.0083643	0.00753249	0.0713468	0.0263698	0.00485322	0.00159128	0.00716271	0.0613716	0.0431781	0.00132614	0.00307686	0.0027214	0.00975286	0.0008801
D03_CONDITION_2	0.0068831	0.00534151	0.00183193	0.00255528	0.00680556	0.0891636	0.111215	0.00255875	0.000900858	0.206264	0.0147549	0.000389024	0.000879329	0.00415932	0.0206985	0.00468436	0.000411327	0.000751449	0.00172726	0.000224655	0.000928306
D04_CONDITION_2	0.00329613	0.000641999	0.00448465	0.00271621	0.00775119	0.0386076	0.0566079	0.00814671	0.00820146	0.0239424	0.00150901	0.00261174	0.000300344	0.0126708	0.0811711	0.0169838	0.00522269	0.00194142	0.00440024	0.00929376	0.00187305
D05_CONDITION_2	0.00759538	0.00630858	0.00193661	0.00577285	0.00457042	0.072417	0.00301805	0.00103328	0.00803035	0.0501932	0.0179562	0.0138419	0.0135609	0.0148381	0.0276243	0.051372	0.0119168	0.00199518	0.00254362	0.00884026	0.000511388
D06_CONDITION_2	0.00238465	0.00348305	0.00355146	0.00366067	0.00695601	0.125609	0.121458	0.00161669	0.00121077	0.0670351	0.0179355	0.0108788	0.0106721	0.0225957	0.0793135	0.0331886	0.00678483	0.00280345	0.00179968	0.00118219	0.00252125
D07_CONDITION_2	0.00150598	0.0013717	0.00144478	0.00681449	0.00586318	0.00572329	0.00618667	0.00209662	0.00178709	0.0473164	0.0187144	0.00627189	0.000387599	0.0104178	0.045444	0.0143031	0.00263482	0.000141847	0.00120508	0.00503891	0.00183033
D08_CONDITION_2	0.00306675	0.00204499	0.00331671	0.00397167	0.009292	0.0683159	0.0323291	0.00788486	0.00574375	0.514816	0.00457055	0.019406	0.00803697	0.0177364	0.249252	0.0880463	0.00157384	0.00281029	0.0034942	0.0161167	0.00175012
D09_CONDITION_2	0.00050814	0.000749354	0.00197537	0.00297688	0.00198005	0.016449	0.0179925	0.00195772	0.00246133	0.0361538	0.00526356	0.000128778	0.000331936	0.00320664	0.0158411	0.00953708	0.000459555	0.000811801	0.00134254	0.00106995	0.000542437
D10_CONDITION_2	0.00464178	0.00386403	0.000949355	0.00821316	0.0106547	0.148995	0.0618296	0.00333154	0.00854136	0.326839	0.0227275	0.00435273	0.01558	0.00776609	0.0792724	0.0299614	0.00150275	0.00118702	0.00137843	0.00621293	0.000871767
D11_CONDITION_2	0.00316882	0.00303395	0.00198663	0.0113676	0.00641292	0.0738318	0.151286	0.00697146	0.0114487	0.175595	0.000965423	0.0016624	0.0111433	0.0185652	0.0249063	0.00336028	0.00391841	0.0026689	0.00296867	0.00739038	0.00132074
D12_CONDITION_2	0.00140691	0.000781505	0.00113104	0.00931189	0.000983108	0.0598559	0.0207658	0.00286786	0.0046464	0.42187	0.00364565	0.00887487	0.00380883	0.00291824	0.211926	0.0744016	0.00134515	0.0014299	0.0028584	0.0227651	0.000514544
D13_CONDITION_2	0.000558864	0.000561755	0.000990858	0.00585437	0.000592128	0.0159853	0.0265403	0.00212458	0.00628944	0.0291651	0.00700275	0.0020903	0.00356334	0.0093992	0.026434	0.0204189	0.00201608	0.00196637	0.000922081	0.00198766	0.00110746
D14_CONDITION_2	0.00351393	0.000152383	0.00902042	0.000209515	0.00183568	0.0292774	0.0333882	4.6809e-05	0.00226985	0.0356632	0.00179543	0.00117842	0.00100268	0.00286394	0.0132593	0.00392976	7.07509e-05	0.000264539	0.00110528	8.31021e-07	0.00129245
D03_CONDITION_3	0.00421911	0.00363249	0.00467058	0.00256571	0.00710393	0.0070727	0.0129171	0.00081819	0.00217825	0.0668375	0.00991207	0.00621376	0.00271908	0.0177079	0.059476	0.0230902	0.0012105	0.00584561	0.00376517	0.00559363	0.00418536
D04_CONDITION_3	0.00558697	0.00427147	0.00391812	0.00326336	0.0086617	0.0800873	0.0376006	0.00327664	0.00913211	0.0294352	0.0203132	0.00319235	0.00265869	0.0151095	0.07046	0.0265961	0.000118163	0.00331244	0.00207553	0.00246175	0.00294212
D05_CONDITION_3	0.00742369	0.00573413	0.00411563	0.0135644	0.0114799	0.0255482	0.13065	0.0034698	0.00323874	0.137531	0.0186799	0.0050619	0.0050314	0.0175475	0.0540136	0.0316311	0.00213874	0.00103558	0.000474971	0.0037028	0.00310417
D06_CONDITION_3	0.00509036	0.00375499	0.00787953	0.0103798	0.00748377	0.0752695	0.057551	0.00959453	0.000733347	0.125021	0.0233904	0.00558401	0.0106018	0.00958175	0.0115629	0.00503286	0.000925137	0.000603448	0.00480777	0.0116434	0.00178507
D07_CONDITION_3	0.00380933	0.00182953	0.00575889	0.00454914	0.00122755	0.0122511	0.0212036	0.00505251	0.00585774	0.0908164	0.0192042	0.00608987	0.001756	0.0112452	0.0523253	0.0129895	0.00380754	0.00403173	0.00604352	0.00189982	0.00337268
D08_CONDITION_3	0.00423931	0.00409875	0.000166707	0.00142662	0.00544349	0.030542	0.0157687	0.00335675	0.00641266	0.0674952	0.0231362	0.00263638	0.00206918	0.00400326	0.010262	0.0109758	0.00052266	0.000856854	0.00718184	0.0186675	0.00430081
D09_CONDITION_3	0.00111693	0.00167297	0.00044178	0.00214183	0.00331641	0.0153739	0.0258721	0.00264936	0.00369875	0.0434608	0.018226	0.00775299	0.00486975	0.0190804	0.133179	0.0106204	0.000801501	0.00134944	0.000889225	0.00187991	0.00148203
D10_CONDITION_3	0.00345035	0.00321868	0.0010542	0.00314896	0.0044294	0.0227187	0.0431859	0.0024157	0.004545	0.0139264	0.0113067	0.00614424	0.00323696	0.0061862	0.023843	0.0110964	0.00137291	0.00204821	0.00297096	0.00245208	0.00109888
D11_CONDITION_3	0.00319829	0.00251217	0.00555511	0.00721389	0.00474817	0.0227614	0.0558565	0.00240286	0.00758294	0.108174	0.0101663	0.00272108	0.0110406	0.0048288	0.0574758	0.0245644	0.00193178	0.00670282	0.00391817	0.00896011	0.00131092
D12_CONDITION_3	0.00228461	0.00139779	0.000614276	0.00717214	0.0068076	0.0457935	0.0988358	0.000345565	0.00410983	0.0765164	0.0124919	0.00393555	0.0110701	0.00961534	0.0219525	0.0296375	0.0022103	0.00239957	0.00797377	0.0139457	0.0025321
D13_CONDITION_3	0.00527608	0.00615163	0.00391023	0.0106565	0.0149507	0.0501406	0.0637328	0.00340312	0.0150374	0.121098	0.0174258	0.00757019	0.00205629	0.00927312	0.0959733	0.0234847	0.00389059	0.00493556	0.00922483	0.0173186	0.00248339
D14_CONDITION_3	0.00131085	0.00202103	0.00296038	0.00246541	0.00654766	0.0500164	0.0482838	0.000584417	0.00471313	0.0314688	0.0157025	0.00527301	0.00464996	0.00144925	0.045614	0.00272585	0.00023633	0.00298155	0.00489018	0.0085048	0.000693316
D03_CONDITION_4	0.00664982	0.00363708	0.00677317	0.00623282	0.00566374	0.0532196	0.0343799	0.00353516	0.00277411	0.0408422	0.0322089	0.00621931	0.00453714	0.0202595	0.0533277	0.0232097	0.00119972	0.00402484	0.0038778	0.00300197	0.00311175
D04_CONDITION_4	0.0015463	0.000747425	0.0040294	0.00138027	0.00454472	0.0311003	0.0425594	0.00494617	0.00481723	0.0624431	0.0165266	0.00263081	0.00289833	0.0172074	0.181772	0.0121177	0.000203447	0.00541194	0.000760114	0.00522614	0.00253307
D05_CONDITION_4	0.0101771	0.00739444	0.00573488	0.0127424	0.0142045	0.0748456	0.0917118	0.00210339	0.00722845	0.108725	0.00777976	0.0044959	0.00332871	0.00833956	0.0195549	0.026371	0.00109134	0.000298763	0.0016718	0.00725833	0.00153296
D06_CONDITION_4	0.00176074	0.00119606	0.00451268	0.00681558	0.00175386	0.00229015	0.0123372	0.00480621	0.00147559	0.0320912	0.00765956	0.00415383	0.00382161	0.00599238	0.0191618	0.00381062	0.000986563	0.00138406	0.00243623	0.0173281	0.000542974
D07_CONDITION_4	0.00051942	0.00170089	0.00130392	0.00551528	0.00414466	0.0555941	0.0347231	0.0066489	0.00709279	0.788433	0.0170217	0.00886189	0.00654848	0.00378872	0.433134	0.141014	0.000453882	0.00642204	0.00318743	0.0636221	0.00133666
D08_CONDITION_4	0.00113635	0.0010785	0.000701709	0.00347205	0.00462366	0.0202902	0.0236369	0.00222745	0.00527172	0.228709	0.0105859	0.00510734	0.00352009	0.00217721	0.158734	0.0347364	0.00267832	0.00415864	0.00237796	0.0188926	0.00140775
D09_CONDITION_4	0.0026788	0.00108075	0.00406418	0.00354459	0.00406188	0.0570746	0.0261648	0.00224483	0.00220914	0.0410267	0.0128035	0.00590813	0.00494639	0.0179758	0.092899	0.0221322	0.00236941	0.00165054	0.00443135	0.00335161	0.000826168
D10_CONDITION_4	0.000930003	0.00101673	0.00134642	0.000702209	0.00503755	0.00775427	0.0889493	0.000249594	0.00192011	0.0340151	0.0224694	0.00240934	0.00899652	0.0161318	0.060516	0.0265325	0.0026814	0.0041582	0.00369839	0.00624863	0.00210115
D11_CONDITION_4	0.00152965	0.000842981	0.00151832	0.00288154	0.0022086	0.0203502	0.0577871	0.00230499	0.00556615	0.0362627	0.0141404	0.00356672	0.0104035	0.00150139	0.0461053	0.0250232	0.00131384	0.00340292	0.00366279	0.0104556	0.00223074
D12_CONDITION_4	0.000157602	0.00109922	0.000720492	0.0021567	0.000364942	0.00318123	0.00197513	0.00126264	0.000708289	0.06816	0.0022716	0.00183891	0.00198458	0.00238115	0.0427929	0.00674473	0.000734077	0.000995678	0.00201375	0.00700453	0.000722681
D13_CONDITION_4	0.00306613	0.0013671	0.00349922	0.00270349	0.00221628	0.0186734	0.0317839	0.00808347	0.00916922	0.0303944	0.0133274	0.00293131	0.00139841	0.00669374	0.0289394	0.00974198	0.000386798	0.00619964	0.00209307	0.00557545	0.00343421
D14_CONDITION_4	0.00428215	0.0045027	0.00275557	0.00674037	0.0118612	0.0436827	0.0584582	0.00805771	0.00739985	0.106457	0.0366242	0.0100799	0.00196437	0.00802307	0.0281425	0.00864443	0.000464385	0.00212945	0.00026718	0.00675844	0.00147255
D03_CONDITION_5	0.00401688	0.00224174	0.00140973	0.0023284	0.00298293	0.0693326	0.0248225	0.0026133	0.0136818	0.0353664	0.00117737	0.00311704	0.000829325	0.00313062	0.0260781	0.00962729	0.000382249	0.00302678	0.00199985	0.00392916	0.00434352
D04_CONDITION_5	0.000643755	0.000964082	0.00155694	0.0110886	0.00198235	0.0224494	0.0287325	0.00518846	0.00448192	0.00586414	0.0234684	0.0057585	0.00157589	0.00858914	0.0971875	0.0410502	0.000350015	0.00120834	0.000357269	0.00571407	0.00117974
D05_CONDITION_5	0.00612168	0.0049474	0.00575315	0.00739844	0.0110973	0.0262271	0.0734961	0.00150962	0.00264382	0.0203727	0.00506593	0.00986325	0.000700575	0.00352846	0.0891008	0.0193675	0.00225414	0.00101967	0.000757446	0.00700456	0.00534516
D06_CONDITION_5	0.00504326	0.00462022	0.00135894	0.00650076	0.00462344	0.0794604	0.0171927	0.00278403	0.00293609	0.075701	0.0130853	0.00162223	0.0104407	0.0107768	0.0185723	0.00883536	0.00147018	0.00101979	0.00188087	0.00643	0.000746091
D07_CONDITION_5	0.00164287	0.00103738	0.00171375	0.001015	0.00159884	0.0255554	0.0182204	0.00256449	0.00382688	0.237931	0.00769073	0.00480722	0.00296514	0.00531459	0.178265	0.0462031	0.00121553	0.00223895	0.00310478	0.0254772	0.00160444
D08_CONDITION_5	0.00408794	0.00297928	0.00572602	0.00475435	0.0026316	0.0680385	0.0187442	0.0045016	0.00348103	0.137017	0.0209284	0.00338404	0.00212444	0.0115157	0.0394571	0.0169111	0.00286626	0.00466878	0.00208961	0.0159501	0.00328886
D09_CONDITION_5	0.000607336	0.00161097	0.00144303	0.00126898	0.00205664	0.00612412	0.00671736	0.00098592	0.00115279	0.0185644	0.000552416	0.001734	0.00122337	0.00347687	0.0285244	0.00363362	0.000613572	0.0012763	0.00105295	0.00712973	0.000789379
D10_CONDITION_5	0.00112166	0.00128076	0.00339436	0.00531039	0.00423432	0.0191186	0.0417835	0.00620328	0.00422526	0.062126	0.0133394	0.0104016	0.0130714	0.00640024	0.0571974	0.0205284	0.00231283	0.00935922	0.00414483	0.00439899	0.00288902
D11_CONDITION_5	0.00119441	0.0014378	0.00136792	0.00549093	0.0085662	0.0963822	0.0690555	0.00928698	0.00786651	1.1794	0.0174495	0.0166964	0.01206	0.0125347	0.585498	0.212978	0.00228896	0.00585387	0.0113608	0.127081	0.00507148
D12_CONDITION_5	6.26661e-05	0.000183586	0.000460684	0.000870974	0.000886143	0.00732379	0.0139188	0.00113269	0.000718218	0.0229658	0.00385193	0.0043273	0.00353912	0.00609315	0.0476937	0.0149705	0.00137588	0.00386118	0.00457337	0.00269534	0.0018416
D13_CONDITION_5	0.00763602	0.00524866	0.0115025	0.00811478	0.00608254	0.0268491	0.0541976	0.00559103	0.00633249	0.0627875	0.0227206	0.00745014	0.00234486	0.00738201	0.0145333	0.00993103	0.00194011	0.0114298	0.0050647	0.00958346	0.00241593
D14_CONDITION_5	0.000782748	0.000372331	0.00214715	0.00358163	0.00149366	0.00531909	0.00660414	0.00226578	0.000771703	0.00949627	0.00223329	0.00112531	0.000923276	0.00181234	0.00691496	0.00323679	0.000657995	0.000661098	0.00377417	0.00905974	0.00297952
D03_CONDITION_6	0.0345428	0.00156122	0.00270103	0.025785	0.00470804	0.0423853	0.106737	0.00235044	0.0075871	0.104804	0.0064988	0.00482248	0.0261316	0.0228415	0.0121176	0.00571178	0.00163281	0.0019661	0.00180868	0.0100522	0.00975698
D04_CONDITION_6	0.0408457	0.00592662	0.0012417	0.033262	0.0107106	0.149753	0.0130793	0.000344197	0.00552644	0.227063	0.00797456	0.00264695	0.000880708	0.0143733	0.00921867	0.0115396	0.000967309	0.00740854	0.00674594	0.0116727	0.00549659
D05_CONDITION_6	0.00347965	0.00246291	0.00657811	0.00607613	0.00617691	0.0684585	0.0335176	0.00797063	0.00692747	0.0541248	0.0020401	0.00364668	0.00161563	0.0134287	0.0899475	0.0296452	0.00233389	0.0038985	0.000459788	0.00457535	0.00252548
D06_CONDITION_6	0.00662065	0.00857272	0.00215996	0.00369687	0.0102735	0.116485	0.0291717	0.00852981	0.0168112	0.0173498	0.00724731	0.000912846	0.00171207	0.00595092	0.0493314	0.0197284	0.00177301	0.000608669	0.0126148	0.0173929	0.00414162
D07_CONDITION_6	0.00362816	0.00350168	0.00415348	0.00407419	0.00678812	0.0704281	0.0817452	0.000691114	0.000458378	0.111661	0.0170646	0.00748493	0.00604018	0.0145389	0.0962342	0.0572099	0.00611585	0.00317024	0.00508033	0.0155176	0.00109758
D08_CONDITION_6	0.00129249	0.00104316	0.0015259	0.00306514	0.00263922	0.0125475	0.075108	0.00133888	0.0012187	0.0741309	0.0253575	0.00702538	0.0104072	0.0242652	0.0162162	0.0372358	0.0041112	0.00415299	0.0019031	0.00350925	0.000338134
D09_CONDITION_6	0.00645244	0.00405627	0.00304213	0.00613754	0.00815359	0.0608172	0.0427418	0.00400393	0.00635572	0.531001	0.0191848	0.00990589	0.00572452	0.0113713	0.231816	0.100573	0.00177118	0.00224243	0.00404973	0.0298277	0.00231669
D10_CONDITION_6	0.000916744	0.000619167	0.000234022	0.00728081	0.00424503	0.0374456	0.0304626	0.000991937	0.00341317	0.0260516	0.0173855	0.00177355	0.00496849	0.0188546	0.0382002	0.0295766	0.0018938	0.00193321	0.00296503	0.00256323	0.00186842
D11_CONDITION_6	0.0030553	0.00301018	0.00163956	0.00526152	0.00597965	0.0608878	0.0485992	0.00218263	0.00316932	0.127425	0.0184225	0.00566598	0.00846678	0.0113886	0.0735259	0.022077	0.000916153	0.00512794	0.00713728	0.0100123	0.00282478
D12_CONDITION_6	0.00160908	0.00197232	0.000857128	0.00222206	0.00385165	0.0204673	0.0290174	0.00276017	0.00531597	0.013309	0.00689781	0.00535668	0.00415311	0.00742235	0.0763816	0.0263251	0.0033967	0.00429208	0.00732405	0.0119555	0.00214573
D13_CONDITION_6	0.00255867	0.00153538	0.000354696	0.00334673	0.0041618	0.027521	0.0331531	0.000988281	0.00711285	0.189757	0.0124516	0.00830599	0.0103164	0.0177148	0.226871	0.0171947	0.00356486	0.00599967	0.00122708	0.0163406	0.0041009
D14_CONDITION_6	0.00321979	0.00178603	0.00138521	0.00160156	0.00237929	0.0110821	0.018252	0.000632227	0.00181588	0.0587783	0.00292592	0.00291109	0.00382143	0.00515413	0.0152046	0.0141938	0.00085355	0.00281942	0.0029376	0.00799834	0.00139709
D03_CONDITION_7	0.00940769	0.00796038	0.0035433	0.000759312	0.00571847	0.0367318	0.0562934	0.00244406	0.00602085	0.0870207	0.0239572	0.00367341	0.00261904	0.00683534	0.123297	0.00895086	0.00143424	0.00857938	0.00228439	0.0162795	0.000856863
D04_CONDITION_7	0.000814464	0.00131263	0.00403173	0.00549683	0.00521656	0.00919344	0.0163592	0.00130333	0.00527623	0.0102643	0.00774377	0.00794107	0.00151113	0.00375094	0.0281111	0.0160261	0.0013015	0.00305919	0.000498659	0.00488096	0.00204753
D05_CONDITION_7	0.00729989	0.00554153	0.00439992	0.00974265	0.0100673	0.167353	0.114503	0.000616451	0.00153133	0.244313	0.00567409	0.0026361	0.00155733	0.00816878	0.109774	0.0147238	0.00366247	0.00581007	0.00424673	0.013668	0.00981249
D06_CONDITION_7	0.00141234	0.00836269	0.00350938	0.011226	0.00583542	0.0275709	0.237455	0.00600745	0.00737876	0.173853	0.0133618	0.00148491	0.00289035	0.0412567	0.0617164	0.0207083	0.00739636	0.0102214	0.0137853	0.0256049	0.0114447
D07_CONDITION_7	0.00310018	0.0227633	0.00227306	0.0101818	0.00354358	0.00299147	0.16373	0.00363032	0.000699131	0.0407316	0.0142832	0.00138924	0.00252028	0.0153534	0.0639381	0.0121884	0.00335458	0.0113196	0.0130094	0.0192034	0.00533656
D08_CONDITION_7	0.0011827	0.00372545	0.00222423	0.00279715	0.00171789	0.00850252	0.00596731	0.0018878	0.00118601	0.00473774	0.000321046	6.23876e-05	0.000298072	0.00202986	0.0143798	0.00334679	0.000857455	0.000245481	0.00193685	0.00293534	0.000839393
D09_CONDITION_7	0.0116872	0.0179849	0.00181635	0.00824975	0.0120565	0.0117751	0.00990768	0.0050514	0.00166163	0.0658607	0.0183055	0.00415567	0.00312767	0.0111484	0.029648	0.0220373	0.00345993	0.00505163	0.0014041	0.00408653	0.0021629
D10_CONDITION_7	0.00848946	0.00936068	0.00316804	0.0205935	0.00154573	0.0262739	0.0148343	0.0124738	0.00266003	0.0460655	0.00265461	0.0029167	0.0185061	0.0251295	0.0156801	0.0279641	0.00187426	0.0143277	0.00147011	0.00641122	0.00248753
D11_CONDITION_7	0.00522883	0.0185136	0.000806266	0.0137459	0.00863253	0.0273046	0.0335459	0.00809741	0.0124973	0.0657578	0.0135463	0.00416943	0.00493072	0.0117089	0.0390523	0.025812	0.00397507	0.00606493	0.0027776	0.00649097	0.0067164
D12_CONDITION_7	0.00360909	0.0115358	0.00232341	0.010495	0.00561711	0.0300033	0.0278446	0.00495722	0.00293822	0.157892	0.0168318	0.00548235	0.0139851	0.00836805	0.0368774	0.0369863	0.00455548	0.00410985	0.00451998	0.012008	0.00222057
D13_CONDITION_7	0.000967517	0.00584868	0.000809338	0.0152111	0.0125944	0.164096	0.0113399	0.00365408	0.00226039	0.113796	0.00531362	0.00299429	0.00362921	0.00757886	0.0565729	0.0147304	0.00234379	0.0019883	0.00222812	0.00567724	0.00100417
D14_CONDITION_7	0.00919641	0.0134927	0.00260383	0.0247332	0.00414961	0.158846	0.0168917	0.00453394	0.00593706	0.148078	0.00146059	0.00354678	0.00711007	0.00900827	0.0258604	0.0234639	0.0010676	0.0052083	0.00725352	0.00777204	0.00325865
D03_CONDITION_8	0.00334417	0.0029357	0.00223884	0.00335416	0.00510702	0.0816924	0.010273	0.00307402	0.0100336	0.0612281	0.00454721	0.00305694	0.000709656	0.0228899	0.0155349	0.0115654	0.000884812	0.00019668	0.00128903	0.00359965	0.00204879
D04_CONDITION_8	0.00107571	0.000287654	0.00363269	0.00148561	0.00265872	0.0082231	0.0072857	0.00216008	0.00169356	0.0125158	0.00765942	0.00126808	0.000805237	0.00271683	0.0229982	0.0122624	0.00129425	0.000640262	0.00255101	0.00334362	0.000831567
D05_CONDITION_8	0.00472619	0.00285235	0.00690243	0.0199496	0.0066682	0.105493	0.103804	0.000908741	0.00183375	0.195106	0.018451	0.0100108	0.00336545	0.0190523	0.0208717	0.040676	0.00454516	0.00501684	0.00227575	0.00732162	0.00247302
D06_CONDITION_8	0.0109211	0.0100923	0.00351016	0.00484385	0.0103944	0.0445896	0.0738526	0.00379675	0.00774408	0.0524614	0.0236951	0.00231711	0.016525	0.0167665	0.0108891	0.023197	0.00122178	0.00240728	0.00185607	0.00179159	0.0012001
D07_CONDITION_8	0.0055722	0.00483537	0.000397845	0.00606352	0.00539636	0.047872	0.0509681	0.00111953	0.00759691	0.133907	0.0178683	0.0061416	0.000928519	0.0110624	0.0927616	0.019494	0.00398886	0.00196234	0.0021013	0.00446047	0.00188459
D08_CONDITION_8	0.0137001	0.0129784	0.00239649	0.0054665	0.0039795	0.0221999	0.0935213	0.00129829	0.00662049	0.0684935	0.0107123	0.00694633	0.00395056	0.0183051	0.0711413	0.0267043	0.00455426	0.000553812	0.00170611	0.00342291	0.00498393
D09_CONDITION_8	0.0276579	0.0274292	0.00113854	0.0123576	0.0142545	0.157601	0.0510263	0.00247073	0.0039303	0.153022	0.00974638	0.00458962	0.00984533	0.00778634	0.0295545	0.038423	0.00026469	0.00127307	0.00116153	0.0109348	0.00239933
D10_CONDITION_8	0.0024822	0.00311944	0.000718599	0.00269453	0.0016453	0.0171764	0.0188532	0.0027149	0.00320655	0.0223507	0.00291887	0.00128625	0.000696824	0.00246369	0.0177299	0.0111644	0.00073293	0.000808982	0.00172592	0.00421496	0.000735926
D11_CONDITION_8	0.0172295	0.0147556	0.00165805	0.00306288	0.00653778	0.0362347	0.0624904	0.00107622	0.00546539	0.0519513	0.00489067	0.00891268	0.00432218	0.0107706	0.108796	0.0272558	0.00409843	0.00208403	0.00368043	0.00423111	0.00214317
D12_CONDITION_8	0.0134604	0.0122379	0.000382845	0.00915283	0.00391717	0.0617017	0.0946627	0.00111932	0.00228574	0.0978066	0.00267397	0.00212064	0.00498455	0.0189027	0.0443505	0.0580307	0.00457148	0.00503503	0.000974268	0.0086623	0.00345696
D13_CONDITION_8	0.0259909	0.0248867	0.00495218	0.0127545	0.0137417	0.0137842	0.0208041	0.00374228	0.00185799	0.0302966	0.0261057	0.0154182	0.000497232	0.00744169	0.0759353	0.0238503	0.000773067	0.00149405	0.00412287	0.00987931	0.00495865
D14_CONDITION_8	0.00736264	0.00527589	0.00464798	0.00460188	0.00856587	0.0100251	0.0213637	0.0022827	0.0046014	0.112118	0.0143373	0.00419498	0.00618144	0.00712691	0.0796129	0.00423667	0.00429553	0.00523458	0.00250184	0.00521577	0.00567018
D03_CONDITION_9	0.00532718	0.00474527	0.00379665	0.00725259	0.00470669	0.0840055	0.0328712	0.00194502	0.00633531	0.0553247	0.00566564	0.0047353	0.00216146	0.0128013	0.0363191	0.0166899	0.00206252	0.0022538	0.00176056	0.00672325	0.00292322
D04_CONDITION_9	0.00697444	0.00720526	0.00669634	0.0164036	0.0180661	0.0796697	0.087027	0.00175121	0.00345163	0.107744	0.027783	0.00289131	0.0127964	0.0106338	0.0409644	0.017807	0.004517	0.00136109	0.00392623	0.0126286	0.00853938
D05_CONDITION_9	0.0049649	0.00348664	0.00774754	0.00485057	0.00782733	0.0205142	0.0872994	0.00176275	0.00161257	0.0366505	0.0164457	0.00994907	0.00466076	0.0110892	0.0533501	0.0220887	0.00545535	0.000765559	0.00315531	0.0123026	0.00909647
D06_CONDITION_9	0.00280742	0.00300183	0.00639831	0.00394355	0.00434091	0.00498112	0.0108256	0.00202203	0.00121852	0.0632008	0.0124637	0.00363207	0.00218686	0.00778024	0.0862509	0.0202351	0.000917394	0.00187061	0.00158113	0.00873859	0.0017049
D07_CONDITION_9	0.00152376	0.00152044	0.00101644	0.000910319	0.00155907	0.0116752	0.00963982	0.00118112	0.0011224	0.102911	0.00469631	0.000759109	0.000981322	0.00304753	0.0921908	0.0365397	0.000316258	0.000941747	0.000680746	0.00525128	0.000573008
D08_CONDITION_9	0.00286769	0.00298719	0.00132033	0.00638704	0.00641511	0.0239082	0.0177405	0.000198385	0.0040636	0.128338	0.0119405	0.00587991	0.004061	0.00851588	0.13306	0.0111945	0.00324257	0.00264534	0.00327502	0.00936001	0.00301215
D09_CONDITION_9	0.00363634	0.00387266	0.000758414	0.007407	0.00760467	0.0306444	0.0357813	0.00188174	0.00552636	0.0335876	0.0164049	0.011293	0.0161215	0.0168107	0.0965933	0.0319224	0.00204732	0.00280642	0.00304578	0.00641876	0.00101294
D10_CONDITION_9	0.00414608	0.00177267	0.00300324	0.0063111	0.0109266	0.0463049	0.056487	0.00631956	0.00548948	0.0702703	0.0177964	0.00470644	0.0109341	0.00338683	0.0658184	0.0287852	0.000509371	0.00319243	0.00400807	0.00596145	0.0045716
D11_CONDITION_9	0.00218932	0.000935938	0.00114865	0.00174915	0.00405744	0.0522304	0.0316141	0.00355226	0.00639983	0.0668901	0.0104893	0.00663612	0.00934139	0.0124211	0.0893426	0.0185641	0.00280987	0.0025514	0.00154522	0.00894073	0.00339126
D12_CONDITION_9	0.000104801	0.000386418	0.00140065	0.00445497	9.14506e-05	0.0469759	0.0337718	0.00474962	0.00408316	0.0255817	0.012316	0.00420635	0.00324342	0.00549013	0.0718433	0.02154	0.00182683	0.00296931	0.00721471	0.0195731	0.00360577
D13_CONDITION_9	0.00304889	0.00452213	0.0139287	0.00226294	0.00410289	0.0202829	0.016327	0.00408503	0.00116157	0.028043	0.00482009	0.00400335	0.00125527	0.00439017	0.0345377	0.0207218	0.00167061	0.0014353	0.00547051	0.000960506	0.00204265
D14_CONDITION_9	0.00130349	0.000760022	0.00304679	0.00150743	0.00072238	0.0127366	0.0154923	0.00285162	0.00278108	0.0342535	0.00585949	0.000556618	0.00231837	0.00301043	0.0189994	0.00253076	0.000243092	0.00271922	0.00132092	0.00958794	0.00126816
D03_CONDITION_10	0.00214849	0.00144889	0.0025293	0.00607235	0.0026445	0.0345198	0.0520617	0.000533489	0.00326635	0.0140982	0.0157849	0.00672654	0.0031251	0.0171305	0.0412103	0.0209248	0.00117537	0.00532963	0.00471981	0.00794545	0.00507151
D04_CONDITION_10	0.00248089	0.00231226	0.00232818	0.00112053	0.00573197	0.0555643	0.0487614	0.00293177	0.00593177	0.118741	0.00116934	0.00486139	0.00192665	0.00613788	0.0308527	0.0333716	0.000122865	0.00422322	0.00404401	0.0081062	0.00140008
D05_CONDITION_10	0.000259899	0.00142584	0.00460849	0.00225456	0.000680076	0.0030894	0.0075884	0.00377665	0.00140321	0.0199986	0.00322654	0.011519	0.00188737	0.0108791	0.00635711	0.039764	0.0030096	0.00496815	0.00838658	0.0159899	0.00287705
D06_CONDITION_10	0.00251929	0.00329934	0.000644211	0.00402102	0.00652215	0.0521304	0.0152206	0.00490507	0.00206003	0.0579044	0.0136584	0.00488708	0.00640407	0.00367568	0.0751765	0.0202719	0.00379117	0.00527642	0.00675212	0.0114781	0.00367492
D07_CONDITION_10	0.00458446	0.00390182	0.0050613	0.00453375	0.00465107	0.0475561	0.0357218	0.00860926	0.00290973	0.0332942	0.0118788	0.00926519	0.00443232	0.0155567	0.119414	0.06456	0.00394859	0.0056997	0.0170801	0.0227406	0.00777379
D08_CONDITION_10	0.00312404	0.00276667	0.00102661	0.00547048	0.00662172	0.052773	0.00942357	0.00223291	0.000902975	0.0354563	0.0179624	0.00558375	0.0133702	0.0105751	0.0733367	0.0301897	0.00454958	0.00694961	0.00849731	0.00987994	0.00279884
D09_CONDITION_10	0.0029989	0.00274291	0.000458178	0.00397515	0.00658335	0.00906507	0.0175904	0.00197878	0.0038933	0.0708968	0.0180678	0.00646269	0.0101386	0.0130177	0.0661974	0.0177455	0.00378913	0.00384815	0.00512712	0.0091858	0.000984974
D10_CONDITION_10	0.00271309	0.00322806	0.00106166	0.00507836	0.00818006	0.0224728	0.0972104	0.00110296	0.00687277	0.118645	0.0116698	0.00471963	0.0113559	0.00783502	0.00837751	0.00297436	0.00136433	0.00968967	0.00423596	0.00927683	0.000711138
D11_CONDITION_10	0.000565195	0.000828657	0.000830317	0.00465988	0.00248639	0.0627719	0.0610604	0.00103143	0.00652067	0.178976	0.0067154	0.00279804	0.0131784	0.00806026	0.0815005	0.021355	0.00168857	0.00247818	0.00409771	0.00717832	0.00167914
D12_CONDITION_10	0.00433354	0.00448781	0.0010016	0.00665376	0.00558425	0.0374457	0.0601958	0.00469935	0.000347087	0.100934	0.0118994	0.00902358	0.0140707	0.008928	0.0743611	0.0601432	0.00183045	0.00116483	0.00234687	0.0127823	0.00174622
D13_CONDITION_10	0.000412905	0.00289956	0.00805422	0.00442359	0.00293487	0.00603392	0.0164397	0.000660443	0.00391793	0.0231754	0.0057692	0.00302066	0.00144475	0.00305464	0.0193578	0.00343745	0.000548701	0.000877675	0.00313701	0.00673814	0.00096931
D14_CONDITION_10	0.00529053	0.00486023	0.00144211	0.00840404	0.0130111	0.0320082	0.0456397	0.00320968	0.00457914	0.129005	0.0150758	0.00879559	0.0101536	0.00364847	0.0408272	0.0286583	0.00287352	0.00437975	0.00346719	0.00258914	0.00469614
D03_CONDITION_11	0.0126722	0.00334652	0.00838368	0.0215777	0.0118266	0.0707952	0.0828099	0.00174756	0.0037679	0.0133976	0.00651175	0.00136494	0.00135558	0.0135465	0.0184066	0.00826682	0.000135697	0.0112606	0.00485496	0.00717594	0.00553832
D04_CONDITION_11	0.00821602	0.0175161	0.0390692	0.00506168	0.024045	0.147557	0.0469233	0.00293125	0.00102491	0.00769182	0.0564139	0.00335438	0.0197095	0.0450028	0.0387207	0.0561204	0.00805721	0.00307645	0.0369111	0.00275704	0.00309353
D05_CONDITION_11	0.0109516	0.0126657	0.0101689	0.0260828	0.0228864	0.260499	0.284798	0.00374628	0.00787921	0.0409592	0.0178049	0.00132849	0.0083138	0.0432133	0.0486751	0.0151272	0.00257558	0.011614	0.00323056	0.00192162	0.00488932
D06_CONDITION_11	0.0126713	0.000828191	0.00547114	0.0165283	0.00113155	0.0405412	0.0290645	0.00110396	0.000104925	0.0351209	0.00350639	0.00233756	0.00136528	0.00829696	0.0275941	0.00657685	0.00111679	0.00714252	0.00691244	0.00125031	0.00278924
D07_CONDITION_11	0.00596889	0.0202139	0.0195412	0.00609718	0.00470836	0.264661	0.268641	0.00990849	0.00112785	0.031373	0.00782137	0.0038351	0.0199922	0.0298281	0.0176814	0.00245273	0.00530553	0.00302895	0.00222385	0.00129988	0.000941063
D08_CONDITION_11	0.00127033	0.00547089	0.0046902	0.00676785	0.00181665	0.0813967	0.0711938	0.00385535	0.000985758	0.0112921	0.00244408	0.00197957	0.00190239	0.0102895	0.00217878	0.00372984	0.00205411	0.000407625	0.0054699	0.000764303	0.000542513
D09_CONDITION_11	0.0160852	0.0187645	0.00543558	0.00604486	0.0123182	0.192561	0.188728	0.00671759	0.00350208	0.0632742	0.00772955	0.00257597	0.00173545	0.0188754	0.0163347	0.00613946	0.00192168	0.00585591	0.00619537	0.00225244	0.00155173
D10_CONDITION_11	0.00799562	0.00315512	0.00267664	0.00958595	0.000792252	0.0598745	0.0391778	0.00359721	0.00101192	0.0175044	0.00850528	0.00119084	0.00173265	0.0158406	0.0125404	0.00321184	0.00130685	0.000833735	0.00272457	0.00270144	0.00231147
D11_CONDITION_11	0.00323115	0.00263087	0.00403064	0.0138841	0.0134124	0.145836	0.150983	0.00196493	0.00015947	0.0246522	0.00602035	0.00182135	0.00263047	0.0199446	0.0418349	0.0116038	0.00186769	0.00280301	0.0157226	0.00768123	0.0146648
D12_CONDITION_11	0.00855679	0.0208381	0.00780334	0.0033013	0.00458483	0.182375	0.222732	0.00519734	0.00680549	0.0337619	0.00777947	0.00151297	0.00229774	0.006749	0.00927568	0.0133819	0.00149022	0.00360469	0.00536461	0.00542576	0.00353249
D13_CONDITION_11	0.0229408	0.0238942	0.0156162	0.0155003	0.0461253	0.0677166	0.0377052	0.00466305	0.00407921	0.123514	0.0176094	0.00470868	0.0158568	0.0201144	0.013394	0.0382353	0.00272257	0.00186053	0.00275859	0.0116168	0.00794924
D14_CONDITION_11	0.0109973	0.019838	0.0153365	0.0117132	0.0383531	0.0451918	0.0789119	0.00633368	0.00364942	0.0705333	0.0146509	0.00154478	0.0179806	0.00079116	0.00456748	0.00985208	0.00166487	0.00420027	0.00286241	0.00672575	0.00106538
